# Supplementary material for: A paper-based colorimetric assay for rapid detection of four macrolides in milk
Source: Royal Society of Chemistry journal article supplement (doi:10.1039/c9qm00429g), 2019-01-01
Supplement: c9qm00429g1.pdf [file c9qm00429g1.pdf]

# **A paper-based colorimetric assay for rapid detection of four macrolides in milk**

Lu Zeng<sup>a,b</sup>, Liqiang Liu<sup>a,b</sup>, Hua Kuang<sup>a,b</sup>, Gang Cui<sup>c</sup>, Chuanlai Xu<sup>a,b\*</sup>

*<sup>a</sup>State Key Laboratory of Food Science and Technology, Jiangnan University, Wuxi, People's Republic of China;*

*<sup>b</sup>International Joint Research Laboratory for Biointerface and Biodetection, and School of Food Science and Technology, Jiangnan University, Wuxi, People's Republic of China; <sup>c</sup>Yancheng Teachers University, Yancheng, People's Republic of China;*

*\*Corresponding author. Email: xcl@jiangnan.edu.cn;*

## **Caption:**

**Fig. S1.** LC-MS/MS analysis of milk sample.

**Fig. S2.** LC-MS analysis of CLA-CMO.

**Fig. S3.** The SDS-PAGE of immunogens and coating antigens.

**Table S1.** Cross-reactivity of structurally related analogs to the Mab 4D5 using an ic-ELISA.

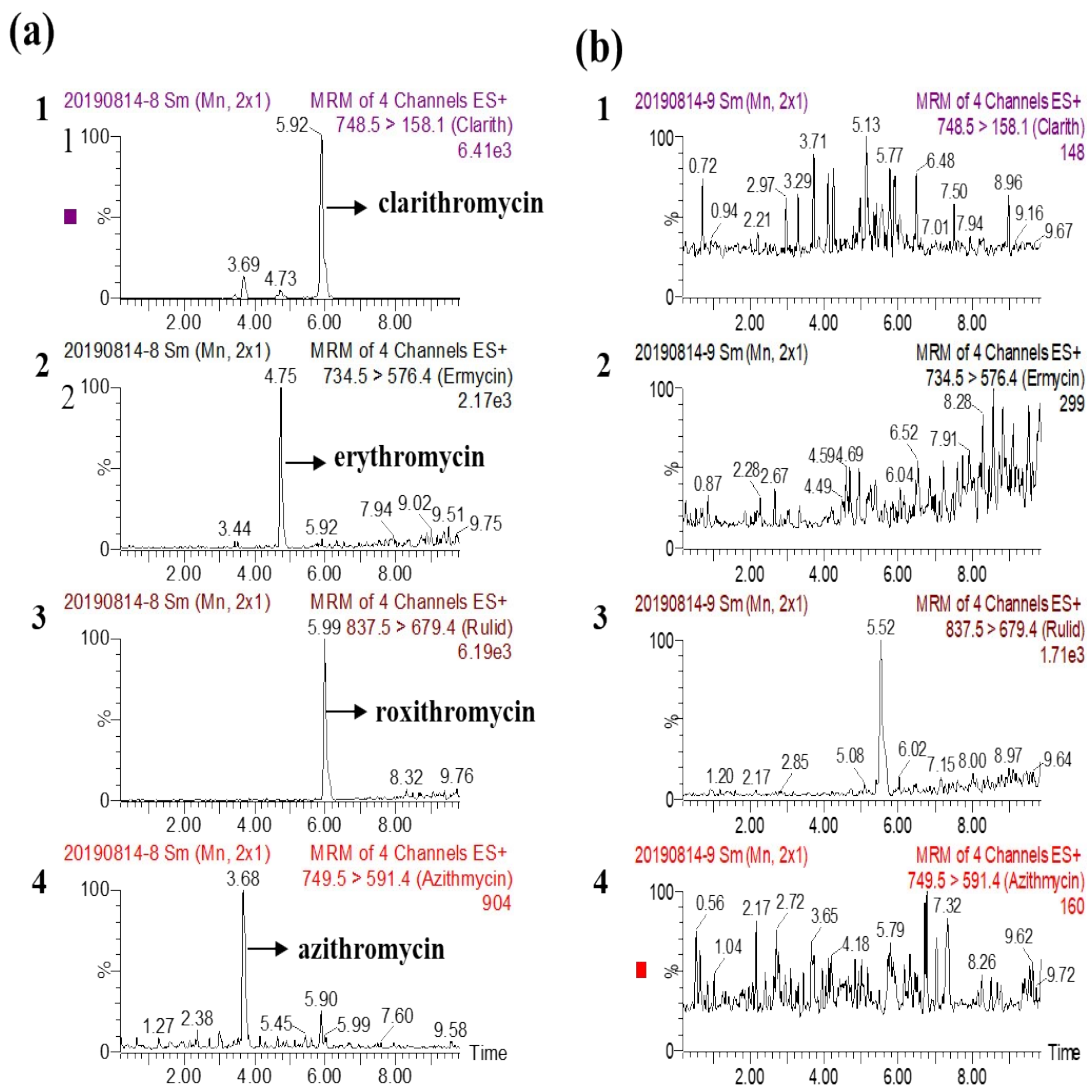

**Fig. S1.** LC-MS/MS analysis of milk sample. (a) MRM spectrum of the four macrolides standard analytes: CLA, ERY, ROX and AZI at the concentration of 3 ng/mL; (b) MRM spectrum of the four macrolides in milk negative sample.

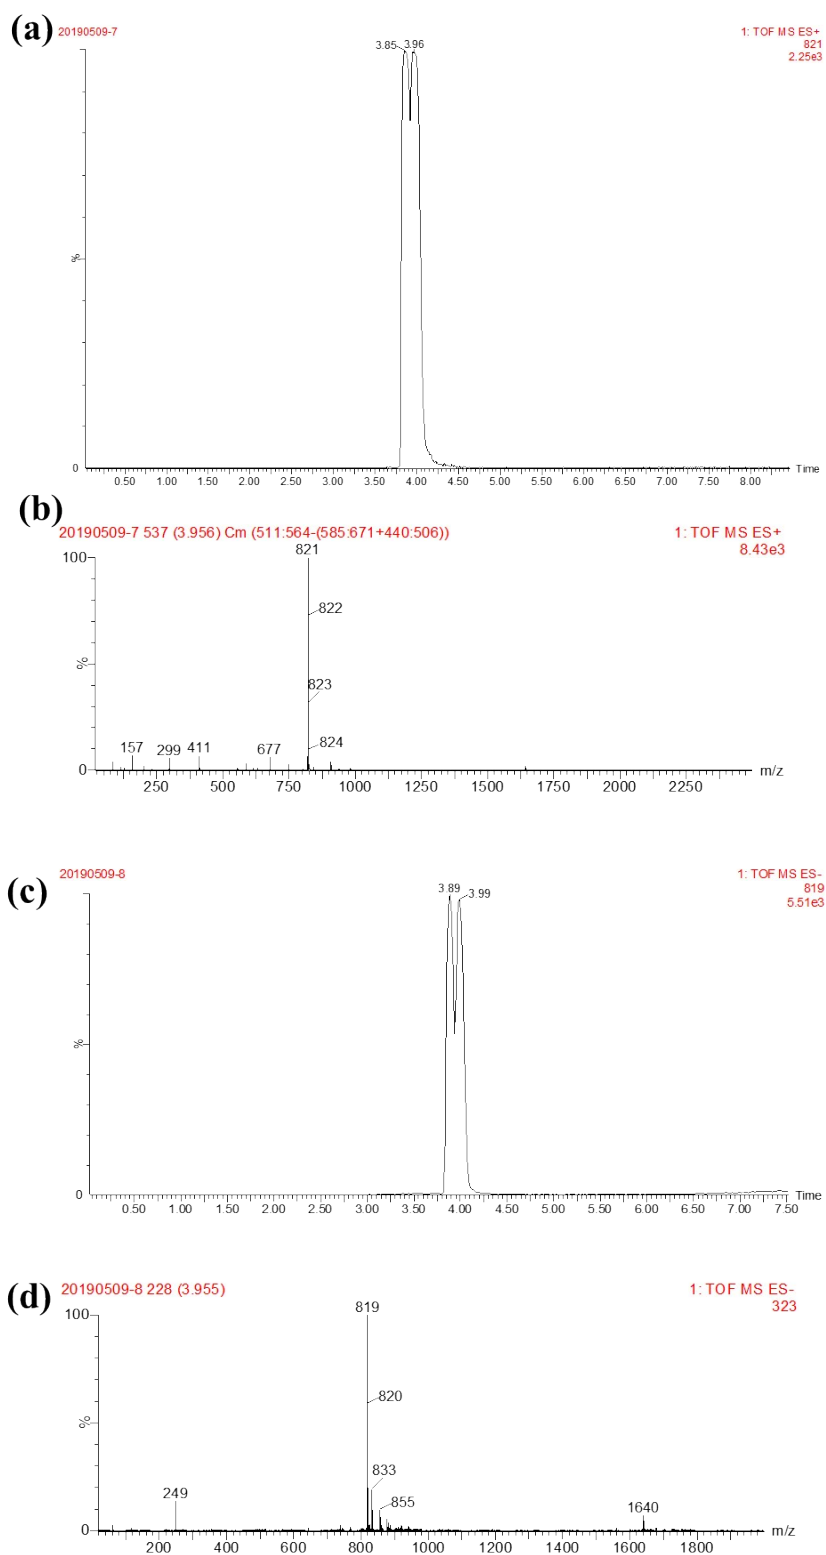

**Fig. S2.** MS analysis of CLA-CMO. (a) (b) the mass spectrum of CLA-CMO in positive ion mode; (c)(d) the mass spectrum of CLA-CMO in negative ion mode.

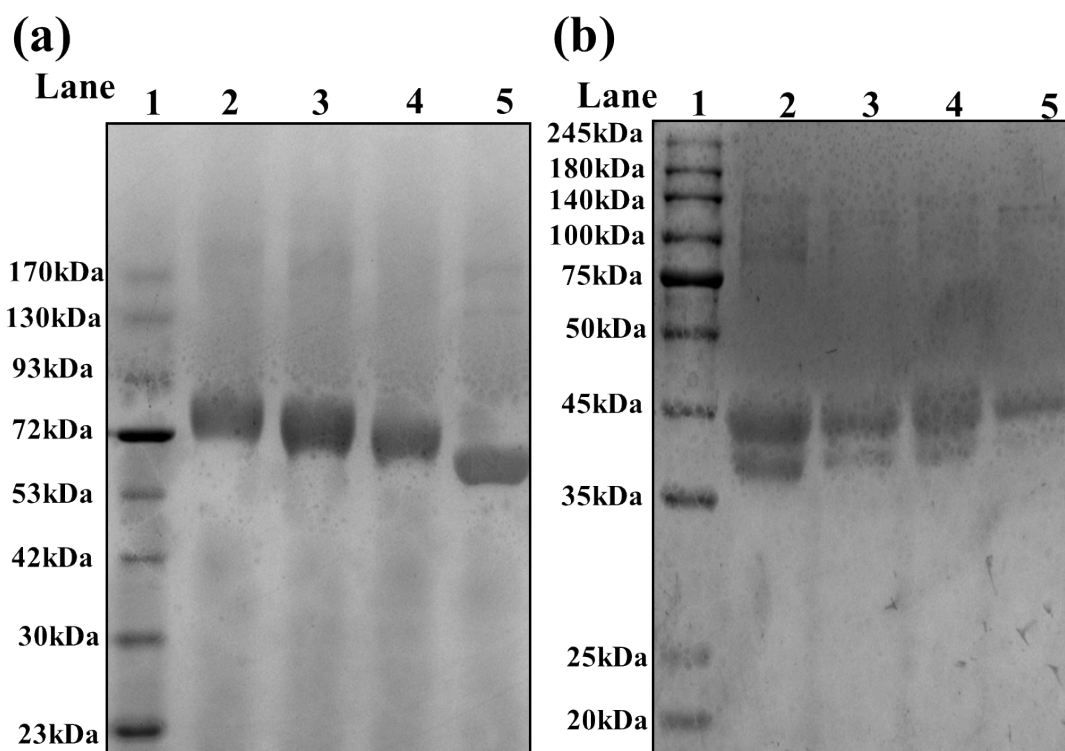

**Fig. S3.** The SDS-PAGE of immunogens and coating antigens. (a) SDS-PAGE of CLA-CMO-BSA. Lane 1, Marker; Lane 2, CLA-CMO-BSA90; Lane 3, CLA-CMO-BSA60; Lane 4, CLA-CMO-BSA30; Lane 5, BSA; (B) SDS-PAGE of CLA-CMO-OVA. Lane 1, Marker; Lane 2, OVA; Lane 3, CLA-CMO-OVA5; Lane 4, CLA-CMO-OVA10; Lane 5, CLA-CMO-OVA15.

**Table S1.** Cross-reactivity of structurally related analogs to the Mab 4D5 using an ic-ELISA.

| Antibiotics | Structure | IC <sub>50</sub> (ng/mL) | CR (%) |
|-------------|-----------|--------------------------|--------|
|-------------|-----------|--------------------------|--------|

|               |                                                                                     |                    |       |
|---------------|-------------------------------------------------------------------------------------|--------------------|-------|
| Medecamycin   | 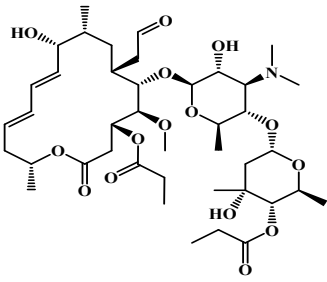   | >10.0 <sup>a</sup> | < 2.0 |
| Kitasamycin   |    | >10.0              | < 2.0 |
| Spiramycin    |   | >10.0              | < 2.0 |
| Tulathromycin |  | >10.0              | < 2.0 |
| Josamycin     |  | >10.0              | < 2.0 |
| Tylosin       |  | >10.0              | < 2.0 |

|              |                                                                                     |       |       |
|--------------|-------------------------------------------------------------------------------------|-------|-------|
| Tilmicosin   | 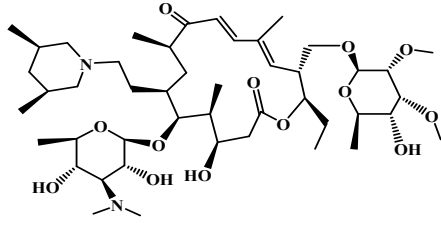   | >10.0 | < 2.0 |
| Avermectin   |    | >10.0 | < 2.0 |
| Ivermectin   |   | >10.0 | < 2.0 |
| Doramectin   |  | >10.0 | < 2.0 |
| Eprinomectin |  | >10.0 | < 2.0 |

<sup>a</sup> >10.0 means that absorbance values cannot be decreased at the antibiotic concentration of 10 ng/mL.
